# Supplementary material
Source: PubMed Central journal article supplement (PMC3522280)
Supplement: supp_M112.407718_jbc.M112.407718-1.pdf [file supp_M112.407718_jbc.M112.407718-1.pdf]

**Tab.1. Primers used for gene expression**

| <b>Gene</b>                  | <b>Forward primer</b>       | <b>Reverse primer</b>      |
|------------------------------|-----------------------------|----------------------------|
| <i>NEU1</i>                  | 5'-CCTGGATATTGGCACTGAA-3'   | 5'-CATCGCTGAGGAGACAGAAG-3' |
| <i>NEU2</i>                  | 5'-TGCGCAGAGGAGACTACGA-3'   | 5'-GTCTGCGCGTCATACAAGG-3'  |
| <i>NEU4</i>                  | 5'-ACCGCCGAGAGTGTGTTTGG-3'  | 5'-CGTGGTCATCGCTGTAGAGG-3' |
| <i>BAD</i>                   | 5'-GTTCCAGATCCCAGAGTTTG-3'  | 5'-CCTCCATGATGGCTGCTG-3'   |
| <i>BAX</i>                   | 5'-TTTCTGACGGCAACTTCAAC-3'  | 5'-GGAGGAAGTCCAATGTCCAG-3' |
| <i>BCL-2</i>                 | 5'-GAGGATTGTGGCCTTCTTTG-3'  | 5'-CCCAGCCTCCGTTATCCT-3'   |
| <i>BCL-XL</i>                | 5'-ACATCCCAGCTCCACATCAC-3'  | 5'-CGATCCGACTCACCAATACC-3' |
| <i>MMP1</i>                  | 5'-TGTGGTGTCTCACAGCTTCC-3'  | 5'-TTTTCAACTTGCCTCCCATC-3' |
| <i>MMP2</i>                  | 5'-GTTGGTGGGAACTCAGAAGG-3'  | 5'-TGACTCGCTTCTTCATATCC-3' |
| <i>MMP7</i>                  | 5'-AGCTCATGGGGACTCCTACC-3'  | 5'-AGACTGCTACCATCCGTCCA-3' |
| <i>MMP9</i>                  | 5'-AGTCCACCCTTGTGCTCTTC-3'  | 5'-ATTTCGACTCTCCACGCATC-3' |
| <i>RAB25</i>                 | 5'-TTGACCTAACCAAGCACCAGA-3' | 5'-TCTCCAGGAAGAGCAGTCCA-3' |
| <i>CLIC3</i>                 | 5'-TCTTCATGGTCCTGCTCCTC-3'  | 5'-GCGTCTCCTCCAGAAAGTCC-3' |
| GD1a synthase                | 5'-TCTACCACCCAGCCTTCATC-3'  | 5'-TAGTGGTGCCAGTTCCTTT-3'  |
| GM1 synthase                 | 5'-CGCCTTCCAGGACTCCTACC-3'  | 5'-CCGTCTTGAGGACGTATCGG-3' |
| GM2 synthase                 | 5'-TCTCACTGGAGAGGGTCAGG-3'  | 5'-CGGACTGTGTCTGCTGTGTT-3' |
| GM3 synthase                 | 5'-CCCTGAACCAGTTCGATGTT-3'  | 5'-CATTGCTTGAAGCCAGTTGA-3' |
| <i>A4GALT</i>                | 5'-TTCTCAAGAACCTGCGGAAC-3'  | 5'-GATCCAGCCGTTGTAGTGGT-3' |
| <i>ACTB</i> ( $\beta$ actin) | 5'-CGACAGGATGCAGAAGGAG-3'   | 5'-ACATCTGCTGGAAGGTGGA-3'  |
